# Supplementary material for: Design, construction and optimization of a synthetic RNA polymerase operon in Escherichia coli
Source: bioRxiv or medRxiv preprint supplement (doi:10.1101/2021.11.05.467461), 2021-11-05
Supplement: Supplementary file [file media-1.pdf]

## Supplementary data

### **Design, construction and optimization of a synthetic RNA polymerase operon in *Escherichia coli*.**

Joep Houkes<sup>1</sup>, Lorenzo Olivi<sup>1</sup>, Zacharie Paquet<sup>1</sup>, Nico J. Claassens<sup>1,\*</sup>, John van der Oost<sup>1,\*</sup>

<sup>1</sup>Laboratory of Microbiology, Wageningen University and Research, Stippeneng 4, 6708 WE Wageningen, The Netherlands.

\* To whom correspondence should be addressed. Nico J. Claassens Tel: +31612880653, Email: [nico.claassens@wur.nl](mailto:nico.claassens@wur.nl) Correspondence may also be addressed to John van der Oost Tel: +31610785536 ,Email: [john.vanderoost@wur.nl](mailto:john.vanderoost@wur.nl)

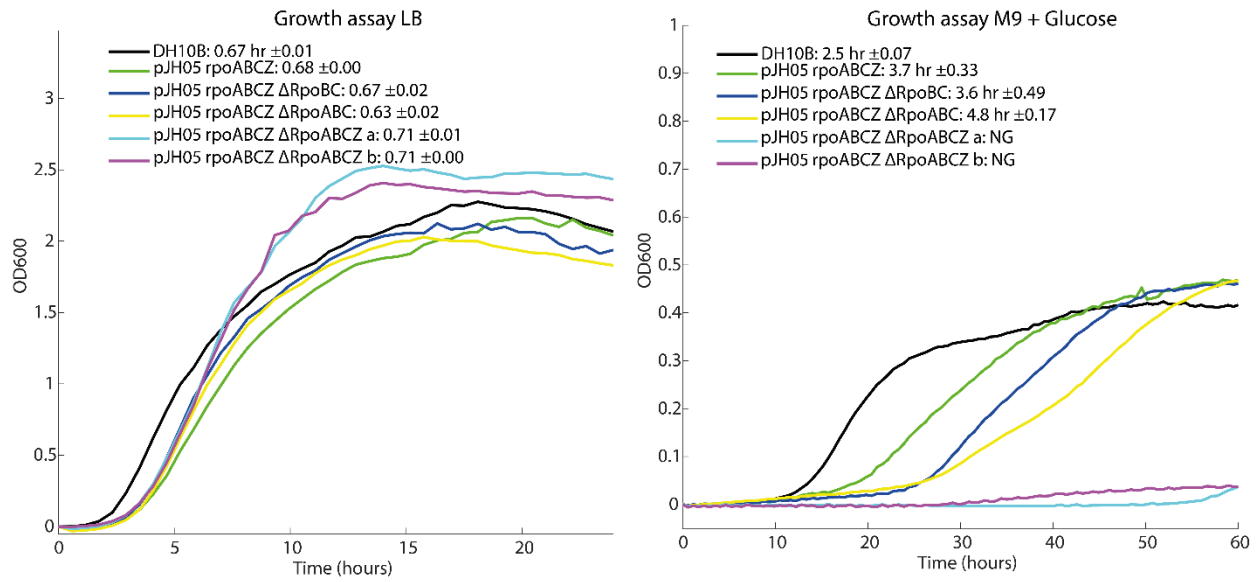

**Suppl. Fig. 1. Growth assays of *E. coli* strains harboring the RNAP operon on LB (left) and M9 medium with glucose (right).** Representation of each line shown in figure legend, numbers are doubling time, time point of highest doubling time, and max OD reached, respectively. Lines are means of 6 technical replicates.

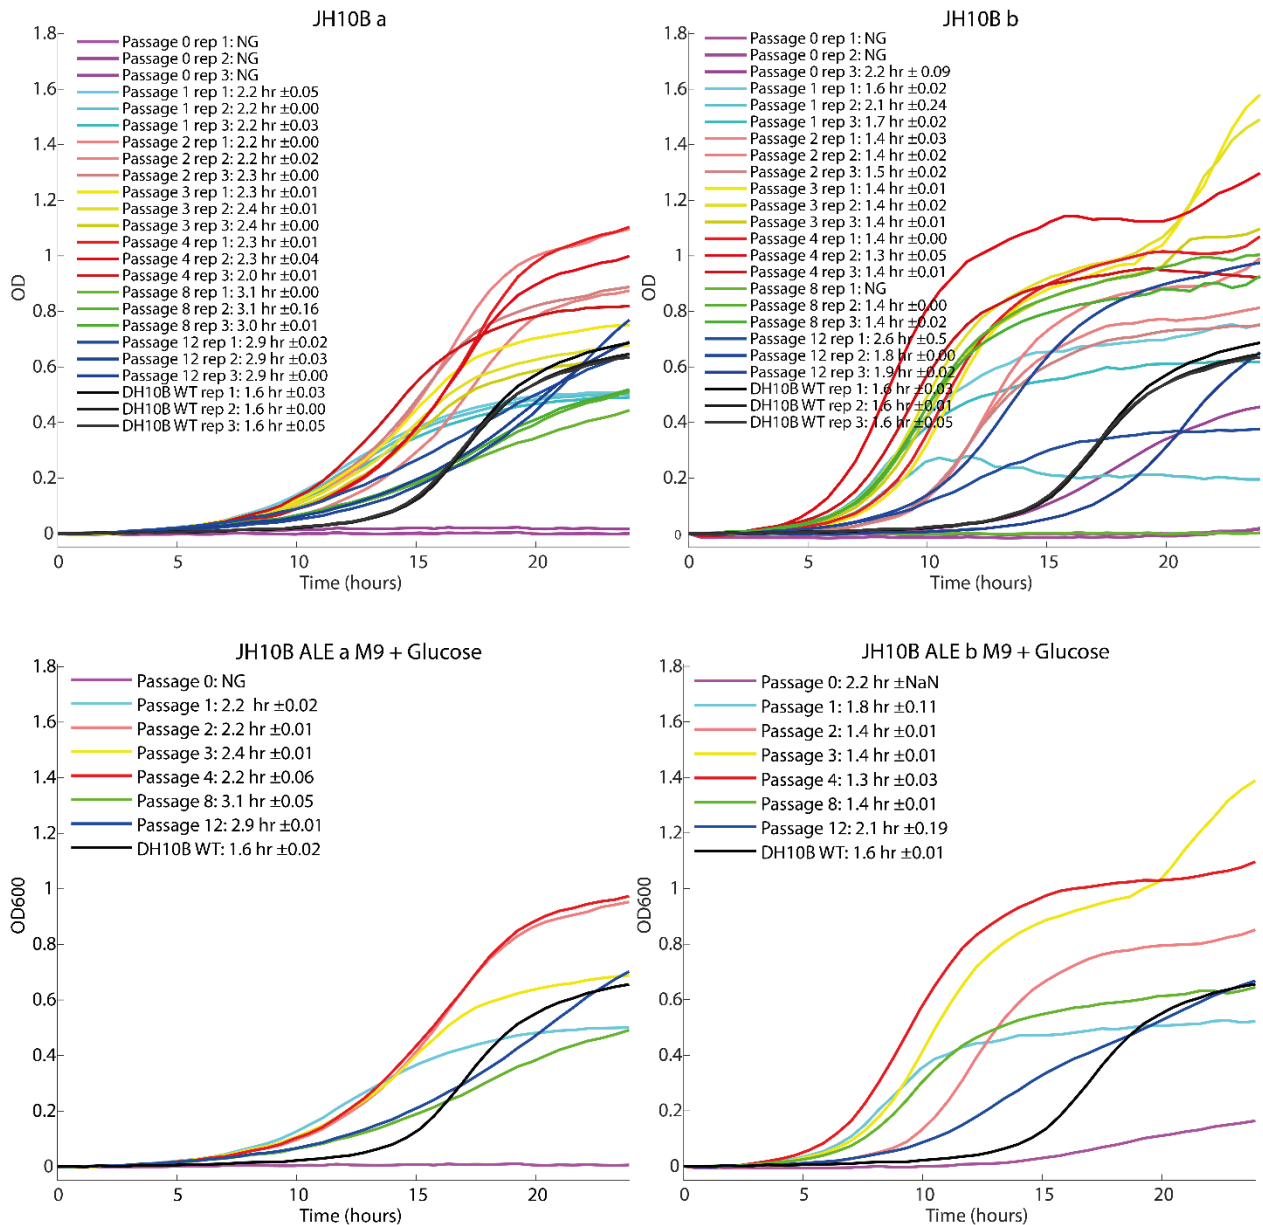

**Suppl. fig. 2. Growth assays of *E. coli* strains harboring the RNAP operon after ALE on M9+glucose, all replicates.** Top graphs has all three biological replicates per passage consisting out of 2 technical replicates split out. Bottom graphs have biological replicates combined. Each Representation of each line shown in figure legend. Doubling time and standard deviation are indicated.

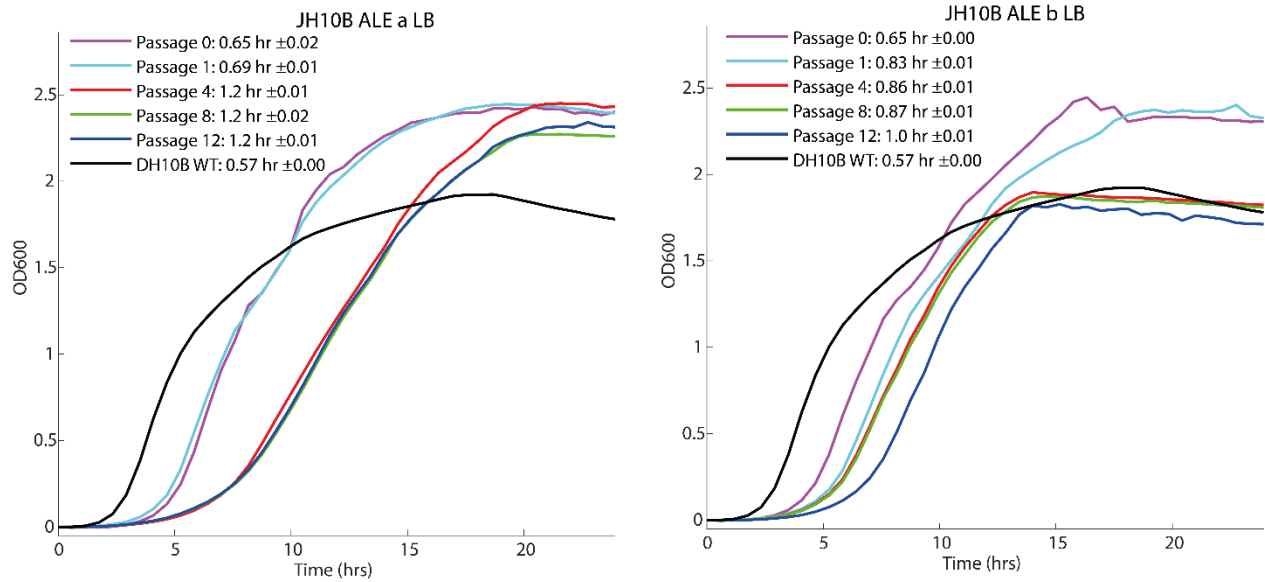

**Suppl. Fig. 3 Growth assays of *E. coli* strains harboring the RNAP operon after ALE on LB medium.** Representation of each line shown in figure legend. Doubling time and standard deviation of 6 replicates are indicated.

**Suppl. table 1. Combinations of promoters and RBSs tested for *rpoA*.** Combination in red was not obtained, green combinations allowed complementation of the lethal  $\Delta rpoA$  mutation, doubling times measured in the consequent growth assay are included.

|                   | P <sub>Weak</sub> | P <sub>Moderate</sub> |       | P <sub>Strong</sub> |       | P <sub>Native</sub> |       |
|-------------------|-------------------|-----------------------|-------|---------------------|-------|---------------------|-------|
| RBS <sub>20</sub> | pJL_wA20          | pJL_mA20              |       | pJL_sA20            |       | pJL_nA20            |       |
| RBS <sub>40</sub> | pJL_wA40          | pJL_mA40              |       | pJL_sA40            |       | pJL_nA40            |       |
| RBS <sub>60</sub> | pJL_wA60          | pJL_mA60              |       | pJL_sA60            | 0.54  | pJL_nA60            |       |
| RBS <sub>80</sub> | pJL_wA80          | pJL_mA80              | 0.553 | pJL_sA80            | 0.539 | pJL_nA80            |       |
| RBS <sub>98</sub> | pJL_wA98          | pJL_mA98              |       | pJL_sA98            |       | pJL_nA98            |       |
| RBS <sub>N</sub>  | pJL_wAN           | pJL_mAN               | 0.549 | pJL_sAN             | 0.544 | pJL_nAN             | 0.543 |

**Suppl. table 2. List of strains**

| Strain                                                         | Comment                                                                                                                          | Source     |
|----------------------------------------------------------------|----------------------------------------------------------------------------------------------------------------------------------|------------|
| <i>E. coli</i> DH10B                                           | Used for cloning purposes                                                                                                        | Invitrogen |
| <i>E. coli</i> DH10B pJL_mA80 $\Delta rpoA$                    | DH10B $\Delta rpoA$ harboring pJL_mA80                                                                                           | This work  |
| <i>E. coli</i> DH10B pJL_mAN $\Delta rpoA$                     | DH10B $\Delta rpoA$ harboring pJL_mAN                                                                                            | This work  |
| <i>E. coli</i> DH10B pJL_sA60 $\Delta rpoA$                    | DH10B $\Delta rpoA$ harboring pJL_sA60                                                                                           | This work  |
| <i>E. coli</i> DH10B pJL_sA80 $\Delta rpoA$                    | DH10B $\Delta rpoA$ harboring pJL_sA80                                                                                           | This work  |
| <i>E. coli</i> DH10B pJL_sAN $\Delta rpoA$                     | DH10B $\Delta rpoA$ harboring pJL_sAN                                                                                            | This work  |
| <i>E. coli</i> DH10B pJL_nAN $\Delta rpoA$                     | DH10B $\Delta rpoA$ harboring pJL_nAN                                                                                            | This work  |
| <i>E. coli</i> DH10B pJH05 $\Delta rpoA$                       | DH10B $\Delta rpoA$ harboring pJH05                                                                                              | This work  |
| <i>E. coli</i> DH10B pJH05 $\Delta rpoA$<br>$\Delta rpoB/rpoC$ | DH10B $\Delta rpoA$ $\Delta rpoB/rpoC$ harboring pJH05                                                                           | This work  |
| <i>E. coli</i> JH10B                                           | DH10B $\Delta rpoA$ $\Delta rpoB/rpoC$ $\Delta rpoZ$ harboring pJH05                                                             | This work  |
| <i>E. coli</i> JH10B 1-12 a                                    | DH10B $\Delta rpoA$ $\Delta rpoB/rpoC$ $\Delta rpoZ$ harboring pJH05. Evolved for 1-12 generations in M9+glucose                 | This work  |
| <i>E. coli</i> JH10B 1-12 b                                    | DH10B $\Delta rpoA$ $\Delta rpoB/rpoC$ $\Delta rpoZ$ harboring pJH05. Evolved for 1-12 generations in M9+glucose                 | This work  |
| <i>S. cerevisiae</i> CEN.PK2-1D                                | MATa/ $\alpha$ ura3-52/ura3-52 trp1-289/trp1-289 leu2-3_112/leu2-3_112 his3 $\Delta$ 1/his3 $\Delta$ 1 MAL2-8C/MAL2-8C SUC2/SUC2 | Euroscarf  |

**Suppl. table 3. List of plasmids**

| Plasmid    | Description and relevant characteristics                                                                                     | Reference |
|------------|------------------------------------------------------------------------------------------------------------------------------|-----------|
| pHLUM      | Harbors CEN/ARS, <i>his3</i> and <i>ura3</i> used in shuttle vectors                                                         | (1)       |
| pBeloBAC11 | Harbors BAC replication system <i>sopA</i> , <i>sopB</i> , <i>sopC</i> and <i>repE</i>                                       | (2)       |
| pSC020     | Harbors $\lambda$ -red system and <i>cre</i>                                                                                 | (3)       |
| pJL_wA20   | BeloBAC backbone, $\lambda$ -red system, <i>cre</i> , <i>kan</i> and <i>rpoA</i> under weak promoter and RBS <sub>20</sub>   | This work |
| pJL_wA40   | BeloBAC backbone, $\lambda$ -red system, <i>cre</i> , <i>kan</i> and <i>rpoA</i> under weak promoter and RBS <sub>40</sub>   | This work |
| pJL_wA60   | BeloBAC backbone, $\lambda$ -red system, <i>cre</i> , <i>kan</i> and <i>rpoA</i> under weak promoter and RBS <sub>60</sub>   | This work |
| pJL_wA98   | BeloBAC backbone, $\lambda$ -red system, <i>cre</i> , <i>kan</i> and <i>rpoA</i> under weak promoter and RBS <sub>98</sub>   | This work |
| pJL_wAN    | BeloBAC backbone, $\lambda$ -red system, <i>cre</i> , <i>kan</i> and <i>rpoA</i> under weak promoter and RBS <sub>N</sub>    | This work |
| pJL_mA20   | BeloBAC backbone, $\lambda$ -red system, <i>cre</i> , <i>kan</i> and <i>rpoA</i> under medium promoter and RBS <sub>20</sub> | This work |
| pJL_mA40   | BeloBAC backbone, $\lambda$ -red system, <i>cre</i> , <i>kan</i> and <i>rpoA</i> under medium promoter and RBS <sub>40</sub> | This work |
| pJL_mA60   | BeloBAC backbone, $\lambda$ -red system, <i>cre</i> , <i>kan</i> and <i>rpoA</i> under medium promoter and RBS <sub>60</sub> | This work |
| pJL_mA80   | BeloBAC backbone, $\lambda$ -red system, <i>cre</i> , <i>kan</i> and <i>rpoA</i> under medium promoter and RBS <sub>80</sub> | This work |
| pJL_mA98   | BeloBAC backbone, $\lambda$ -red system, <i>cre</i> , <i>kan</i> and <i>rpoA</i> under medium promoter and RBS <sub>98</sub> | This work |
| pJL_mAN    | BeloBAC backbone, $\lambda$ -red system, <i>cre</i> , <i>kan</i> and <i>rpoA</i> under medium promoter and RBS <sub>N</sub>  | This work |
| pJL_sA20   | BeloBAC backbone, $\lambda$ -red system, <i>cre</i> , <i>kan</i> and <i>rpoA</i> under strong promoter and RBS <sub>20</sub> | This work |
| pJL_sA40   | BeloBAC backbone, $\lambda$ -red system, <i>cre</i> , <i>kan</i> and <i>rpoA</i> under strong promoter and RBS <sub>40</sub> | This work |
| pJL_sA60   | BeloBAC backbone, $\lambda$ -red system, <i>cre</i> , <i>kan</i> and <i>rpoA</i> under strong promoter and RBS <sub>60</sub> | This work |
| pJL_sA80   | BeloBAC backbone, $\lambda$ -red system, <i>cre</i> , <i>kan</i> and <i>rpoA</i> under strong promoter and RBS <sub>80</sub> | This work |
| pJL_sA98   | BeloBAC backbone, $\lambda$ -red system, <i>cre</i> , <i>kan</i> and <i>rpoA</i> under strong promoter and RBS <sub>98</sub> | This work |

|          |                                                                                                                                                                                                                                                                    |           |
|----------|--------------------------------------------------------------------------------------------------------------------------------------------------------------------------------------------------------------------------------------------------------------------|-----------|
| pJL_sAN  | BeloBAC backbone, $\lambda$ -red system, <i>cre</i> , <i>kan</i> and <i>rpoA</i> under strong promoter and RBS <sub>N</sub>                                                                                                                                        | This work |
| pJL_nA20 | BeloBAC backbone, $\lambda$ -red system, <i>cre</i> , <i>kan</i> and <i>rpoA</i> under native promoter and RBS <sub>20</sub>                                                                                                                                       | This work |
| pJL_nA40 | BeloBAC backbone, $\lambda$ -red system, <i>cre</i> , <i>kan</i> and <i>rpoA</i> under native promoter and RBS <sub>40</sub>                                                                                                                                       | This work |
| pJL_nA60 | BeloBAC backbone, $\lambda$ -red system, <i>cre</i> , <i>kan</i> and <i>rpoA</i> under native promoter and RBS <sub>60</sub>                                                                                                                                       | This work |
| pJL_nA80 | BeloBAC backbone, $\lambda$ -red system, <i>cre</i> , <i>kan</i> and <i>rpoA</i> under native promoter and RBS <sub>80</sub>                                                                                                                                       | This work |
| pJL_nA98 | BeloBAC backbone, $\lambda$ -red system, <i>cre</i> , <i>kan</i> and <i>rpoA</i> under native promoter and RBS <sub>98</sub>                                                                                                                                       | This work |
| pJL_nAN  | BeloBAC backbone, $\lambda$ -red system, <i>cre</i> , <i>kan</i> and <i>rpoA</i> under native promoter and RBS <sub>N</sub>                                                                                                                                        | This work |
| pJH05    | BeloBAC backbone, CEN/ARS, <i>his3</i> , <i>ura3</i> , $\lambda$ -red system, <i>cre</i> , <i>kan</i> and RNAP operon with strong promoter, RBS <sub>80</sub> <i>rpoA</i> RBS <sub>N</sub> <i>rpoB</i> RBS <sub>80</sub> <i>rpoC</i> RBS <sub>80</sub> <i>rpoZ</i> | This work |



**Suppl. Table 4. List of primers**

| Primer name        | Primer sequence                                                                           | Description                                          |
|--------------------|-------------------------------------------------------------------------------------------|------------------------------------------------------|
| RpoA fw            | ATGCAGGGTTCTGTGACAGAG                                                                     | Used for amplifying genes from <i>E. coli</i> genome |
| RpoA rv            | TTACTCGTCAGCGATGCTTG                                                                      |                                                      |
| RpoB fw            | ATGGTTTACTCCTATACCGAG                                                                     |                                                      |
| RpoB rv            | TTACTCGTCTTCCAGTTCG                                                                       |                                                      |
| rpoC fw            | GTGAAAGATTTATTAAGTTTTCTG                                                                  |                                                      |
| rpoC rv            | TTACTCGTTATCAGAACCGCC                                                                     |                                                      |
| rpoZ fw            | ATGGCACGCGTAACTGTTTCAG                                                                    |                                                      |
| rpoZ rv            | TTAACGACGACCTTCAGCAATAG                                                                   |                                                      |
| rpoA+R20+spacer_fw | GACGTAATCGTCCAACCTTTGAGTAGTGACACAATGCAGGGTTCTGTGACAGAG                                    | Used for amplifying rpoA with respective RBSs        |
| rpoA+R40+spacer_fw | GACGTAATCGTCCAACCTTTGAGACATGACACAATGCAGGGTTCTGTGACAGAG                                    |                                                      |
| rpoA+R60+spacer_fw | GACGTAATCGTCCAACCTTTGCAAGAGGACACAATGCAGGGTTCTGTGACAGAG                                    |                                                      |
| rpoA+R80+spacer_fw | GACGTAATCGTCCAACCTTTGGGAATGACACAATGCAGGGTTCTGTGACAGAG                                     |                                                      |
| rpoA+R98+spacer_fw | GACGTAATCGTCCAACCTTTGAGGAGTGACACAATGCAGGGTTCTGTGACAGAG                                    |                                                      |
| rpoA+Rn+spacer_fw  | GACGTAATCGTCCAACCTTTGAGAGAGGACACAATGCAGGGTTCTGTGACAGAG                                    |                                                      |
| Ps+spacer_fw       | AGGCCGTGCCGGCACGTTGCAATACTTGACATATCACTGTGATTCACATATAATATGCGGACGTAATCGTCCAACCTTTG          | Used for amplifying RpoA with respective promoters   |
| Pm+spacer_fw       | AGGCCGTGCCGGCACGTTGCACCTATTGACAATTAAAGGCTAAAATGCTATAATTCACGACGTAATCGTCCAACCTTTG           |                                                      |
| Pw+spacer_fw       | AGGCCGTGCCGGCACGTTGCTCCCTTTGATATTGCATCCCGGTATATAATATGTCGACGTAATCGTCCAACCTTTG              |                                                      |
| Pn+spacer_fw       | AGGCCGTGCCGGCACGTTGCGATCGTCGAGCTTTACTCCAAGTAAAGCTTAGTACCAAAGAGACGTAATCGTCCAACCTTTG        |                                                      |
| rbs20+rpoB_fw      | TGGGCATGCGCCTGGAAAAC TGCCACCGGCAAGCATCGCTGACGAGTAAGATGGCAACCCTATGGTTTACTCCTATACCGAG       | Used for amplifying rpoB with respective RBSs        |
| rbs40+rpoB_fw      | TGGGCATGCGCCTGGAAAAC TGCCACCGGCAAGCATCGCTGACGAGTAAAGCTGGCAACCCTATGGTTTACTCCTATACCGAG      |                                                      |
| rbs60+rpoB_fw      | TGGGCATGCGCCTGGAAAAC TGCCACCGGCAAGCATCGCTGACGAGTAAACAAGAGAACCCTATGGTTTACTCCTATACCGAG      |                                                      |
| rbs80+rpoB_fw      | TGGGCATGCGCCTGGAAAAC TGCCACCGGCAAGCATCGCTGACGAGTAATAGAGAAACCCTATGGTTTACTCCTATACCGAG       |                                                      |
| rbs98+rpoB_fw      | TGGGCATGCGCCTGGAAAAC TGCCACCGGCAAGCATCGCTGACGAGTAATAGAGGAACCCTATGGTTTACTCCTATACCGAG       |                                                      |
| rbsN+rpoB_fw       | TGGGCATGCGCCTGGAAAAC TGCCACCGGCAAGCATCGCTGACGAGTAACTGAGGAACCCTATGGTTTACTCCTATACCGAG       |                                                      |
| rpoB+overlap_rv    | AAAAAAACCCCGCCGAAGCGGGCGCCAGTAGAAGCAGCAACTGTTAATTAATTA CTCGTCTTCCAGTTCG                   |                                                      |
| rbs20+rpoC_fw      | TGAAAGAGATTTCGTTTCGCTGGGTATCAACATCGAACTGGAAGACGAGTAAAGCTGCCAAATCCGTGAAAGATTTATTAAGTTTTCTG | Used for amplifying                                  |

|                 |                                                                                                                                      |                                                          |
|-----------------|--------------------------------------------------------------------------------------------------------------------------------------|----------------------------------------------------------|
| rbs40+rpoC_fw   | TGAAAGAGATTCGTTGCTGGGTATCAACATCGAACTGGAAGACGAGTAAAGCTGG<br>CAAATCCGTGAAAGATTTATTAAGTTTCTG                                            | rpoC with<br>respective<br>RBSs                          |
| rbs60+rpoC_fw   | TGAAAGAGATTCGTTGCTGGGTATCAACATCGAACTGGAAGACGAGTAAAGTAGG<br>CAAATCCGTGAAAGATTTATTAAGTTTCTG                                            |                                                          |
| rbs80+rpoC_fw   | TGAAAGAGATTCGTTGCTGGGTATCAACATCGAACTGGAAGACGAGTAAAGGAG<br>CAAATCCGTGAAAGATTTATTAAGTTTCTG                                             |                                                          |
| rbs99+rpoC_fw   | TGAAAGAGATTCGTTGCTGGGTATCAACATCGAACTGGAAGACGAGTAACGGAGG<br>CAAATCCGTGAAAGATTTATTAAGTTTCTG                                            |                                                          |
| rbsN+rpoC_fw    | TGAAAGAGATTCGTTGCTGGGTATCAACATCGAACTGGAAGACGAGTAACGGGAG<br>CAAATCCGTGAAAGATTTATTAAGTTTCTG                                            |                                                          |
| rpoC+overlap_rv | AAAAAAACCCCGCCGAAGCGGGCGCCAGTAGAAGCAGCAACTGTTAATTAATTA<br>CTCGTTATCAGAACCGCC                                                         |                                                          |
| rbs20+rpoz_fw   | TTACTCGTTATCAGAACCGCCAGACCTGCGTTCAGCAGTTCTGCCAGGCAGCTAC<br>TTTAAGTATGGCACGCGTAACGTTCAG                                               | Used for<br>amplifying<br>rpoZwith<br>respective<br>RBSs |
| rbs40+rpoZ_fw   | TTACTCGTTATCAGAACCGCCAGACCTGCGTTCAGCAGTTCTGCCAGGCAGACAT<br>TTTAAGTATGGCACGCGTAACGTTCAG                                               |                                                          |
| rbs60+rpoZ_fw   | TTACTCGTTATCAGAACCGCCAGACCTGCGTTCAGCAGTTCTGCCAGGCACGAGT<br>TTTAAGTATGGCACGCGTAACGTTCAG                                               |                                                          |
| rbs80+rpoZ_fw   | TTACTCGTTATCAGAACCGCCAGACCTGCGTTCAGCAGTTCTGCCAGGCAGGCAC<br>TTTAAGTATGGCACGCGTAACGTTCAG                                               |                                                          |
| rbs98+rpoZ_fw   | TTACTCGTTATCAGAACCGCCAGACCTGCGTTCAGCAGTTCTGCCAGGCAGGAGC<br>TTTAAGTATGGCACGCGTAACGTTCAG                                               |                                                          |
| rbsN+rpoZ_fw    | TTACTCGTTATCAGAACCGCCAGACCTGCGTTCAGCAGTTCTGCCAGGCAGGCTT<br>TTTAAGTATGGCACGCGTAACGTTCAG                                               |                                                          |
| rpoZ+T+HR_rv    | ACTCCGTTACAAAGCGAGGCTGGGTATTTCCCGCCTTTCTGTTATCCGCAAAAAA<br>ACCCCGCCGAAGCGGGGCGCCAGTAGAAGCAGCAACTGTTAATTAATTAACGACG<br>ACCTTCAGCAATAG | RpoZ<br>reverse with<br>terminator                       |
| pHLUM_OH_fw     | CCTTTTACAGCCAGTAGTGCTGCGCCAGTCGAGCGACAGGGCGAAGCCCGATCGC<br>TTGCCTGTAACCTACACGC                                                       | Used for<br>amplifying<br><i>his3</i> and<br>CEN/ARS     |
| pHLUM_OH_rv     | GTGTGTAAGCAGAATATATAAGTGCTGTTCCCTGGTGCTTCCCTCGCTACTAATCG<br>GTGTCACTACATAAGAAC                                                       |                                                          |
| Bac_fw          | TACCGCTGAAAGTTCTGCAAAG                                                                                                               | pBelobac11<br>backbone<br>amplification                  |
| Bac_rv          | AACGTGCCGGCACGG                                                                                                                      |                                                          |
| pSC020_OH_fw    | TTACCCAGGCCGTGCCGGCACGTTGCGGCCGCGGATAACAGAAAGGCCGG                                                                                   | Amplification<br>of $\lambda$ -red and<br><i>cre</i>     |
| pSC020_OH_rv    | TGAGTTTTTCTAATTGCGTTGCGCTCACTG                                                                                                       |                                                          |
| Ura3_OH_fw      | CATATTCCATTTTGTAAATTCGTGTCGTTTCTATTATGAATTTCAATTTATCACTCA<br>ACCCTATCTCGGTC                                                          | Amplification<br>of <i>ura3</i>                          |
| Ura3_OH_rv      | ACTCCGTTACAAAGCGAGGCTGGGTATTTCCCGCCTTTCTGTTATCCGCTCAATT<br>CATCATTTTTTTTTATTCTTTTTTTTTG                                              |                                                          |
| rpoA_KO_fw      | GATCGTCGAGCTTTACTCCAAGTAAAGCTTAGTACCAAAGAGAGGACACATAGAGT<br>CGGACTTCGCGTTCGC                                                         | Amplification<br>of KO<br>template for<br><i>rpoA</i>    |
| rpoA_KO_rv      | GATGGCGCATGACCTTATCCTTCTCAGTAAACCTTAACCTGTGATCCGGGCTAGT<br>TATTGCTCAGCGGTGG                                                          |                                                          |
| rpoB_KO_fw      | GTCCGCTCAATGGACAGATGGGTCGACTTGTGACGCGAGCTGAGGAACCCCTTAGAGT<br>CGGACTTCGCGTTCGC                                                       | Amplification<br>of KO                                   |

|            |                                                                              |                                                |
|------------|------------------------------------------------------------------------------|------------------------------------------------|
| rpoC_KO_rv | CATAAAAAACCCGCCGAAGCGGGTTTTTACGTTATTTGCGGATTAACGAGCTAGT<br>TATTGCTCAGCGGTGG  | template for<br><i>rpoB</i> and<br><i>rpoC</i> |
| rpoZ_KO_fw | GATTTCAGTATCATGCCAGTCATTTCTTACCTGTGGAGCTTTTAAAGTTAGAGT<br>CGGACTTCGCGTTCGC   | Amplification<br>of KO                         |
| rpoZ_KO_rv | ATCAGTTGATTCAGGCTTTCAAACAGATACAAGGGCGACCCGCTTTGTGAGCTAGT<br>TATTGCTCAGCGGTGG | template for<br><i>rpoZ</i>                    |

## REFERENCES

1. M. Müllerder et al., "A prototrophic deletion mutant collection for yeast metabolomics and systems biology," *Nat. Biotechnol.*, vol. 30, no. 12, pp. 1176–1178, Dec. 2012.
2. K. Wang, C. Boysen, H. Shizuya, M. I. Simon, and L. Hood, "Complete Nucleotide Sequence of Two Generations of a Bacterial Artificial Chromosome Cloning Vector," *Biotechniques*, vol. 23, no. 6, pp. 992–994, Dec. 1997.
3. S. C. A. Creutzburg, "Structure-function relations of RNA molecules involved in gene expression and host defence," Wageningen University, 2020.
